# Supplementary material for: Humid Heat Equally Impairs Maximal Exercise Performance in Elite Para-Athletes and Able-Bodied Athletes
Source: PubMed Central journal article supplement (PMC10487364; doi:10.1249/mss.0000000000003222), 2023-05-22
Supplement: msse-55-1835-s001.pdf [file msse-55-1835-s001.pdf]

## Supplemental Digital Content 1

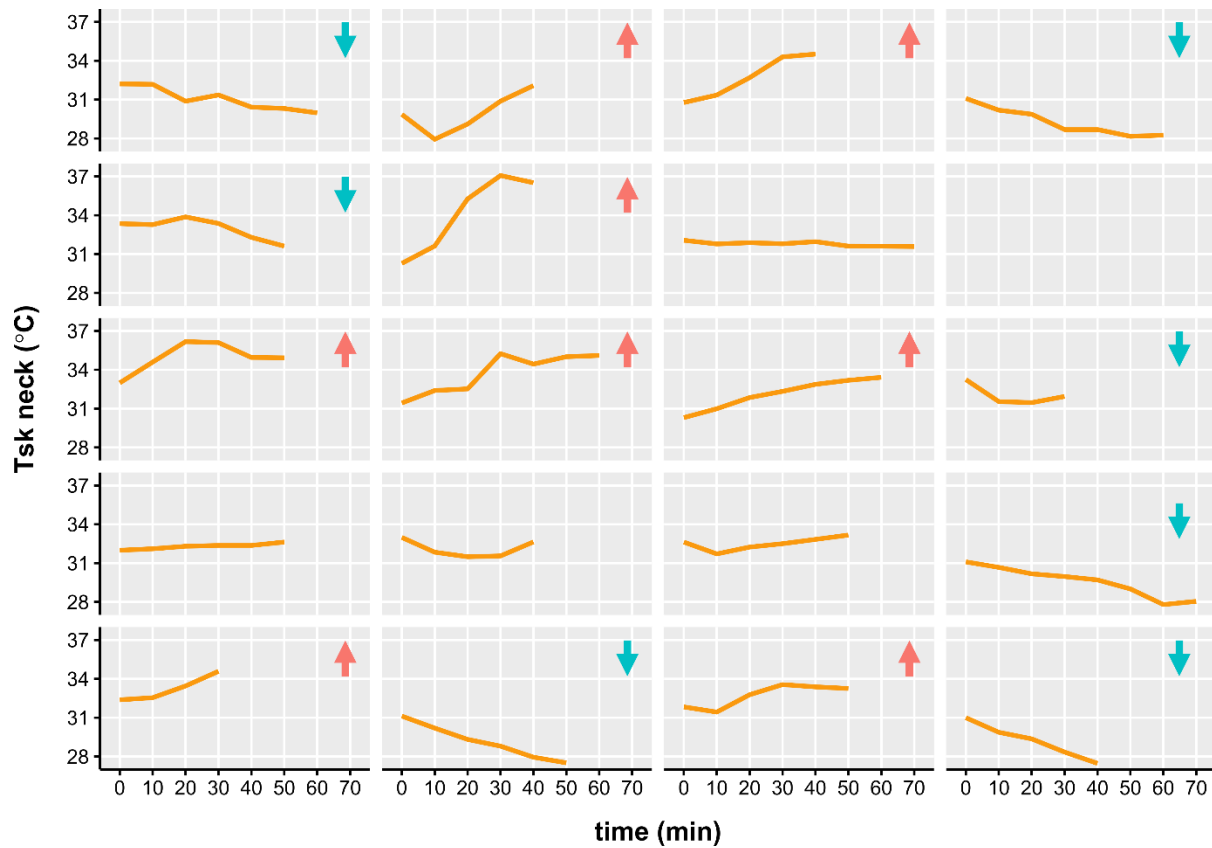

**Supplemental Figure 1.** Neck skin temperature data of individual para-athletes during exercise in temperate conditions. Blue and red arrows indicate whether the participants showed a clear decrease or increase in skin temperature during exercise, respectively (see Supplemental Figure 2 for mean power output of both groups).

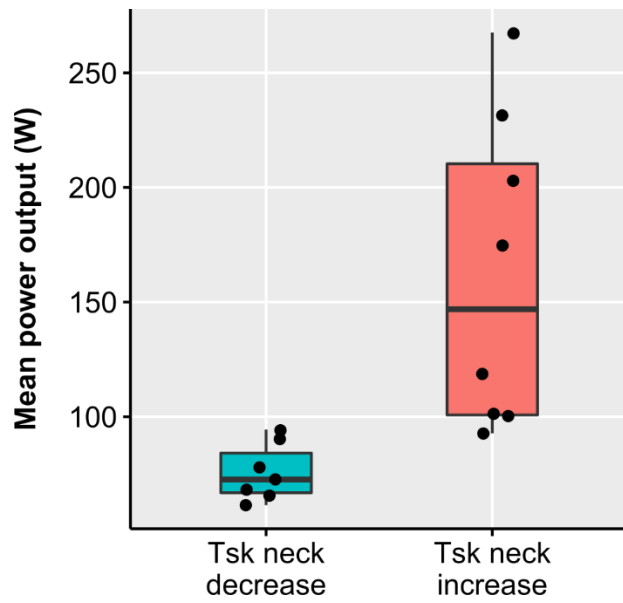

**Supplemental Figure 2.** Mean power output of para-athletes with a skin temperature decrease (indicated by blue arrows in Supplemental Figure 1) or increase (indicated by red arrows in Supplemental Figure 1) during exercise in temperate conditions.
